# Supplementary material for: Virus-host relationships of marine single-celled eukaryotes resolved from metatranscriptomics
Source: PubMed Central journal article supplement (PMC5493757; doi:10.1038/ncomms16054), 2017-06-28
Supplement: ncomms16054-s1.pdf [file ncomms16054-s1.pdf]

Title of file for HTML: Supplementary Information

Description: Supplementary Figures and Supplementary Table

Title of file for HTML: Supplementary Dataset 1

Description: Mapping statistics of reads from the Quantuck Bay libraries to the genes of *Aureococcus anophagefferens* virus (AaV).

Title of file for HTML: Supplementary Dataset 2

Description: Abbreviations and NCBI accession numbers of the reference sequences used to reconstruct the Eukaryotic RPB1, viral RdRP (+ssRNA virus) and viral replicase (ssDNA virus) phylogenies.

1

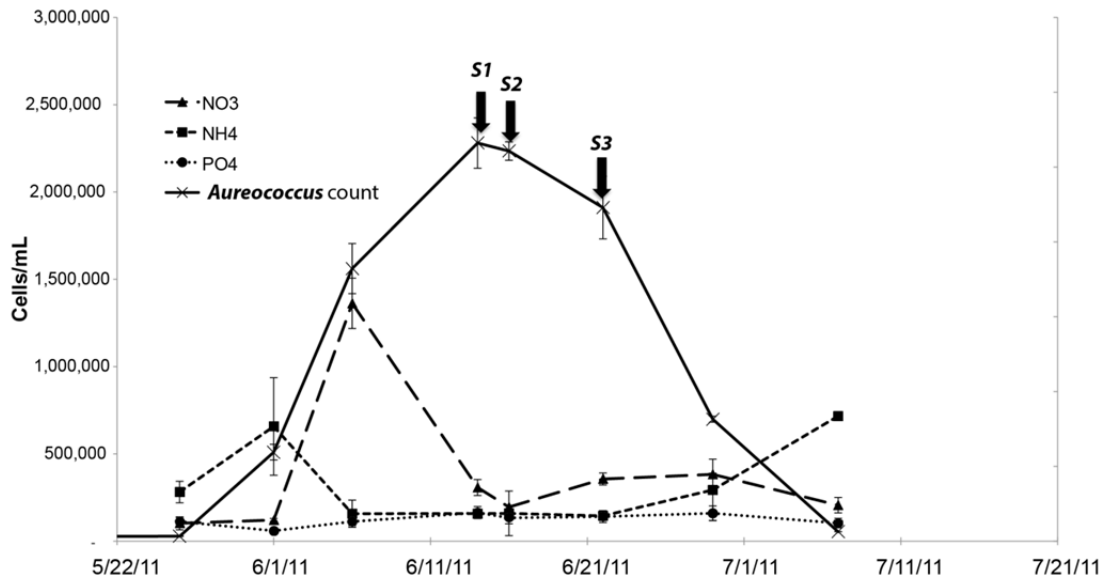

2

3 **Supplementary figure 1:** – *Aureococcus* and nutrient dynamics during different phases of the  
4 brown tide bloom. The samples collected for metatranscriptomic analysis are marked with black  
5 arrows.

6

7

8

9

10

11

12

13

14

15

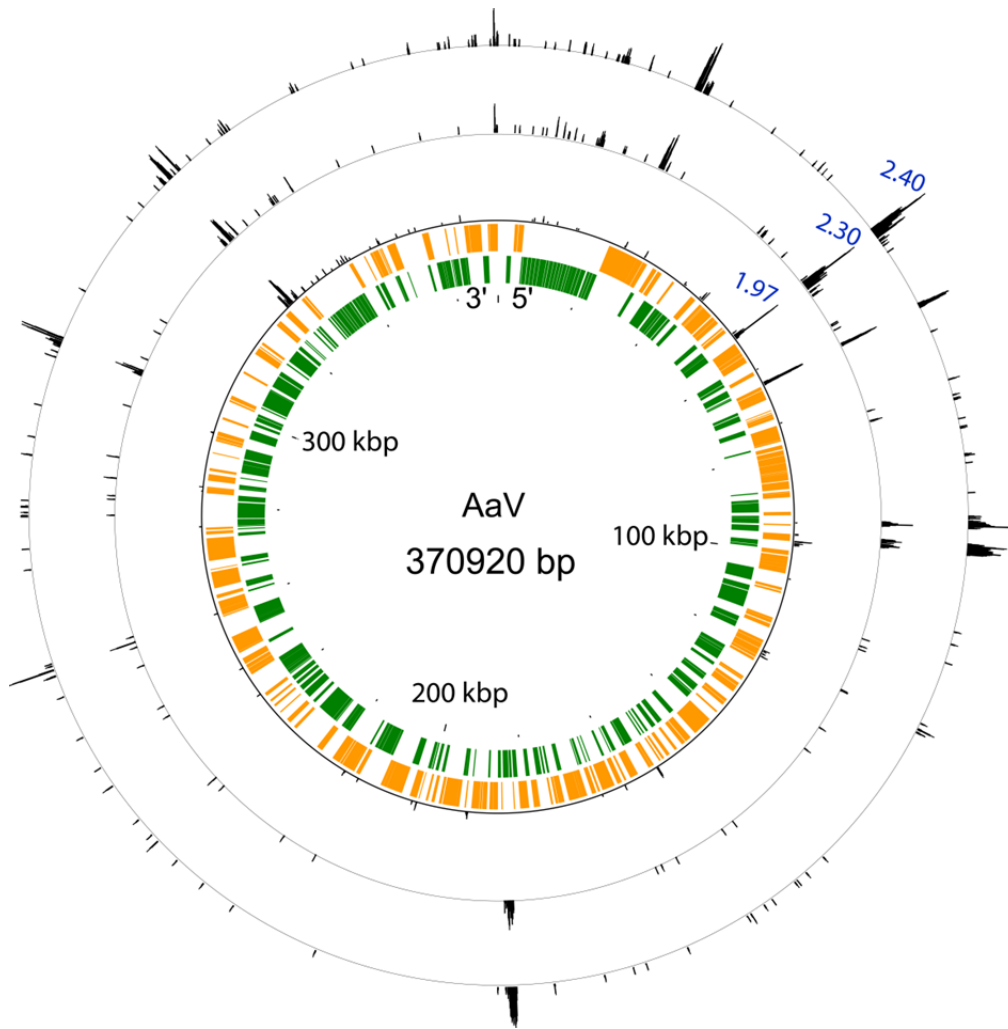

16

17

18 **Supplementary Figure 2:** Normalized read mapping statistics to the 370,920 bp AaV genome  
 19 from the three Quantuck Bay samples. From outermost to innermost ring: Log converted  
 20 number of reads mapped from QB-S1 (June 14), QB-S2 (June 16) and QB-S3 (June 22),  
 21 respectively. Forward CDSs are in green while reverse CDSs are shown in orange. The value in  
 22 blue on each ring represents the highest number of reads (log converted) mapped from the  
 23 particular sample.

24

25

26

27

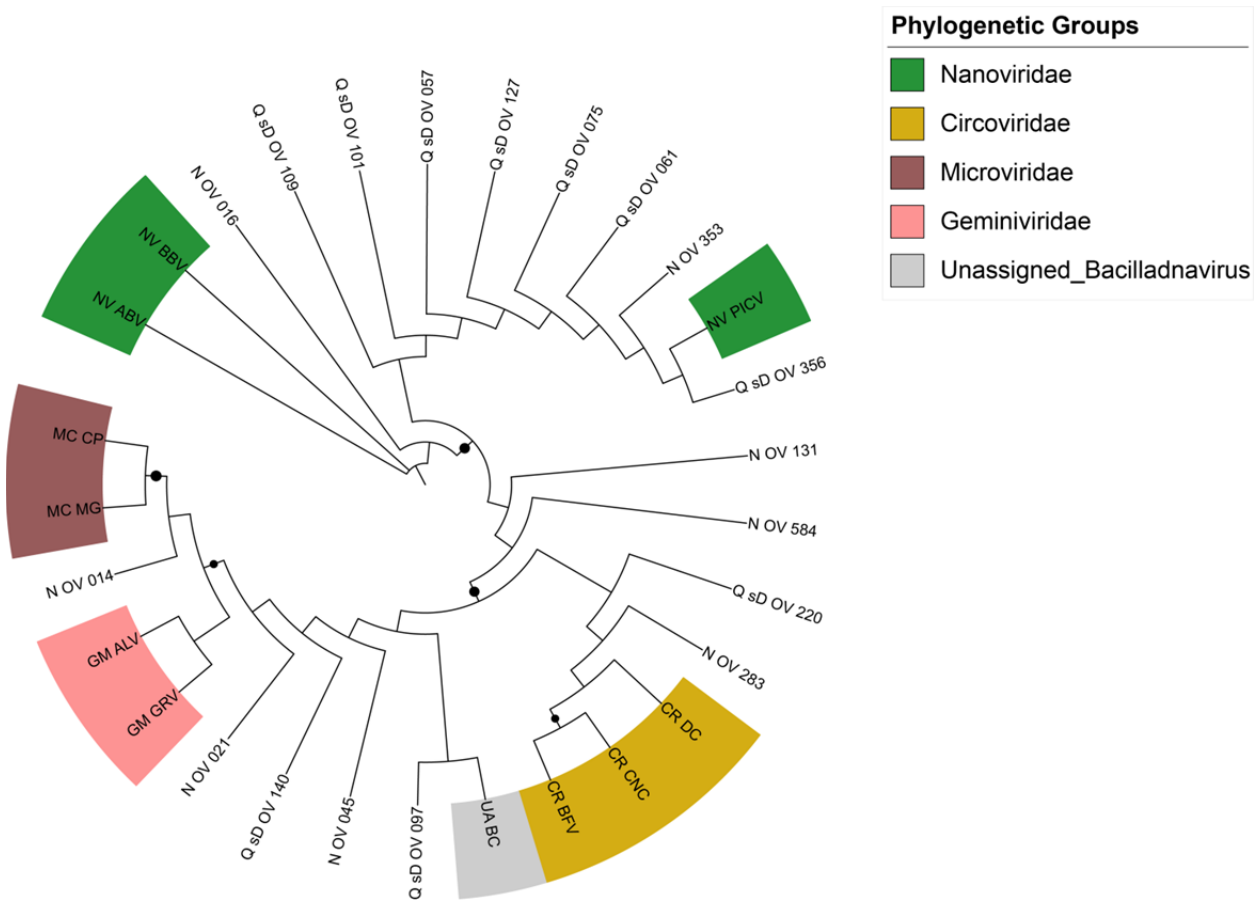

29

30

31

32 **Supplementary Figure 3:** Phylogenetic placement of ssDNA virus contigs (prefix: N\_OV\_ and  
 33 Q\_sR\_OV\_) harboring viral replicase motifs from Quantuck Bay and Narragansett Bay on a  
 34 reference tree. Node support (aLRT-SH statistic) >50% are shown as dark circles. Contigs up to  
 35 225bp are shown. The reference sequences are shown in bold italic typeface. Complete name and  
 36 other details of the reference sequences are presented in Supplementary Data 2.

37

38

39

40

|                           |       |       |       |       |       |
|---------------------------|-------|-------|-------|-------|-------|
| Marnaviridae              | 0.707 | 0.353 | 0.325 | 2.225 | 0.028 |
| Other Picornavirales      | 0.234 | 0.099 | 0.171 | 0.304 | 0.004 |
| Narnaviridae              | 0.904 | 0.105 | 0.330 | 0.969 | 0.045 |
| Alphatetaviridae          | 0.881 | 0.277 | 0.495 | 2.521 | 0.090 |
| Virgaviridae              | 0.032 | 0.127 | 0.413 | 1.971 | 0.146 |
| Potyviridae               | 0.000 | 0.006 | 1.992 | 0.000 | 0.000 |
| PirV-1 like               | 3.948 | 1.490 | 1.821 | 1.076 | 0.511 |
| Fusariviridae             | 0.000 | 0.000 | 0.000 | 0.000 | 0.001 |
| Alvarnaviridae            | 0.042 | 0.006 | 0.001 | 0.008 | 0.000 |
| Totiviridae               | 0.017 | 0.108 | 0.003 | 0.074 | 0.008 |
| Partitiviridae            | 0.002 | 0.095 | 1.016 | 0.074 | 0.017 |
| ssDNA virus               | 2.350 | 3.963 | 1.484 | 5.206 | 0.300 |
| DNA-RNA hybrid virus like | 0.000 | 0.000 | 0.002 | 0.000 | 0.002 |
| Bacillaridnavirus         | 0.065 | 0.115 | 0.431 | 0.895 | 0.048 |

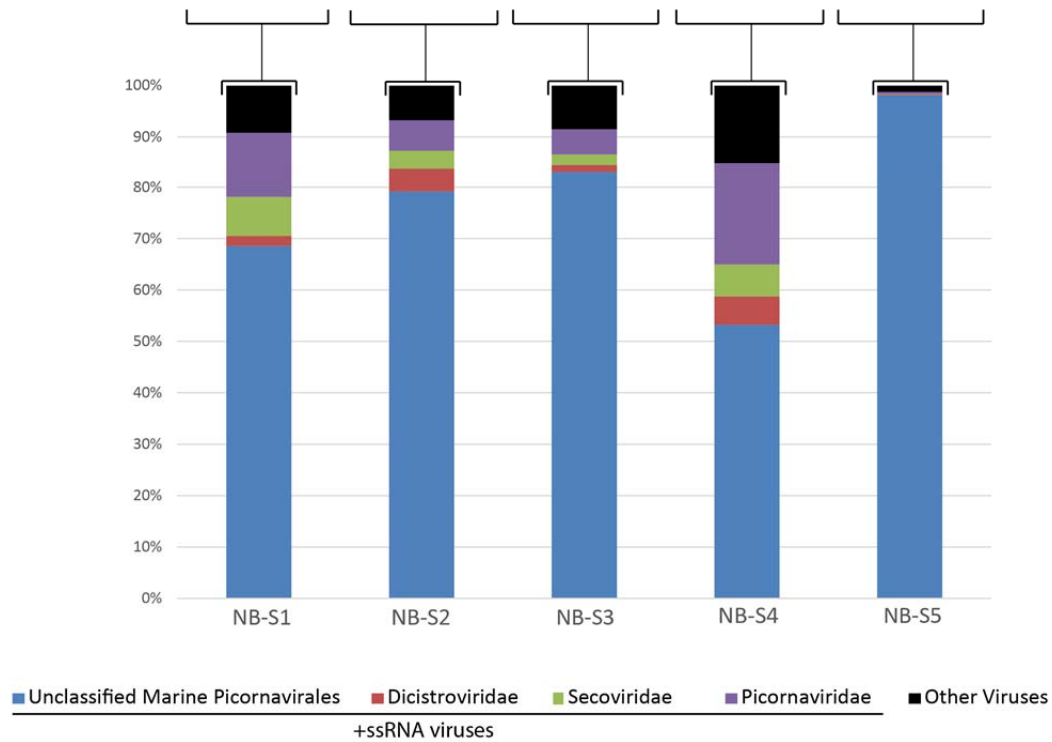

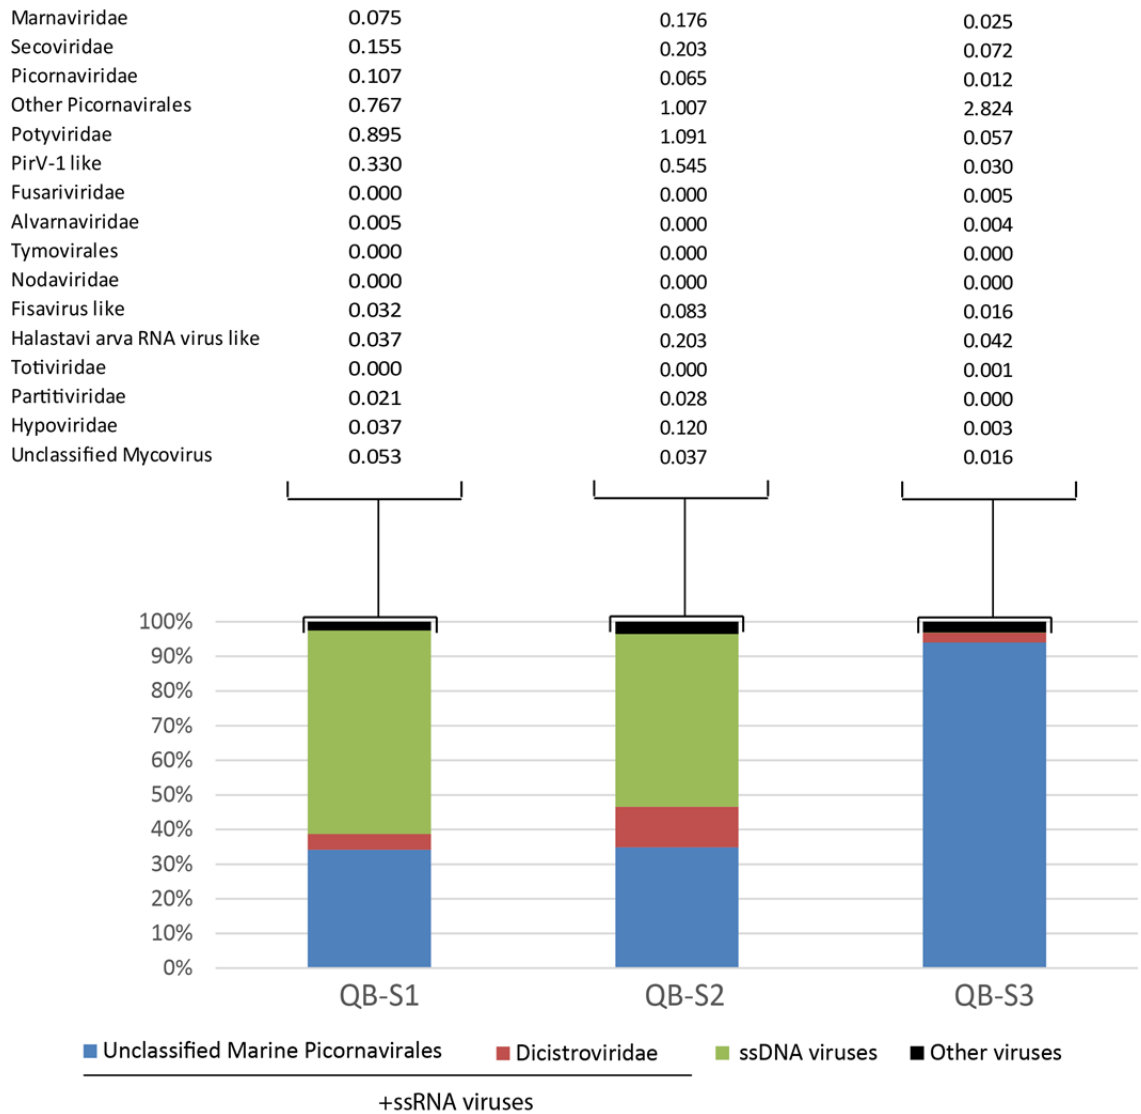

49

50 **Supplementary Figure 5:** Proportional abundance of reads (in percentage) assigned to different  
 51 viral groups in the Quantuck Bay study site over the three *in situ* samples. The ‘other viruses’  
 52 portion (in black) is further broken down into viral groups in the tables, which represent a minor  
 53 contribution towards the diversity.

54

55

56

57

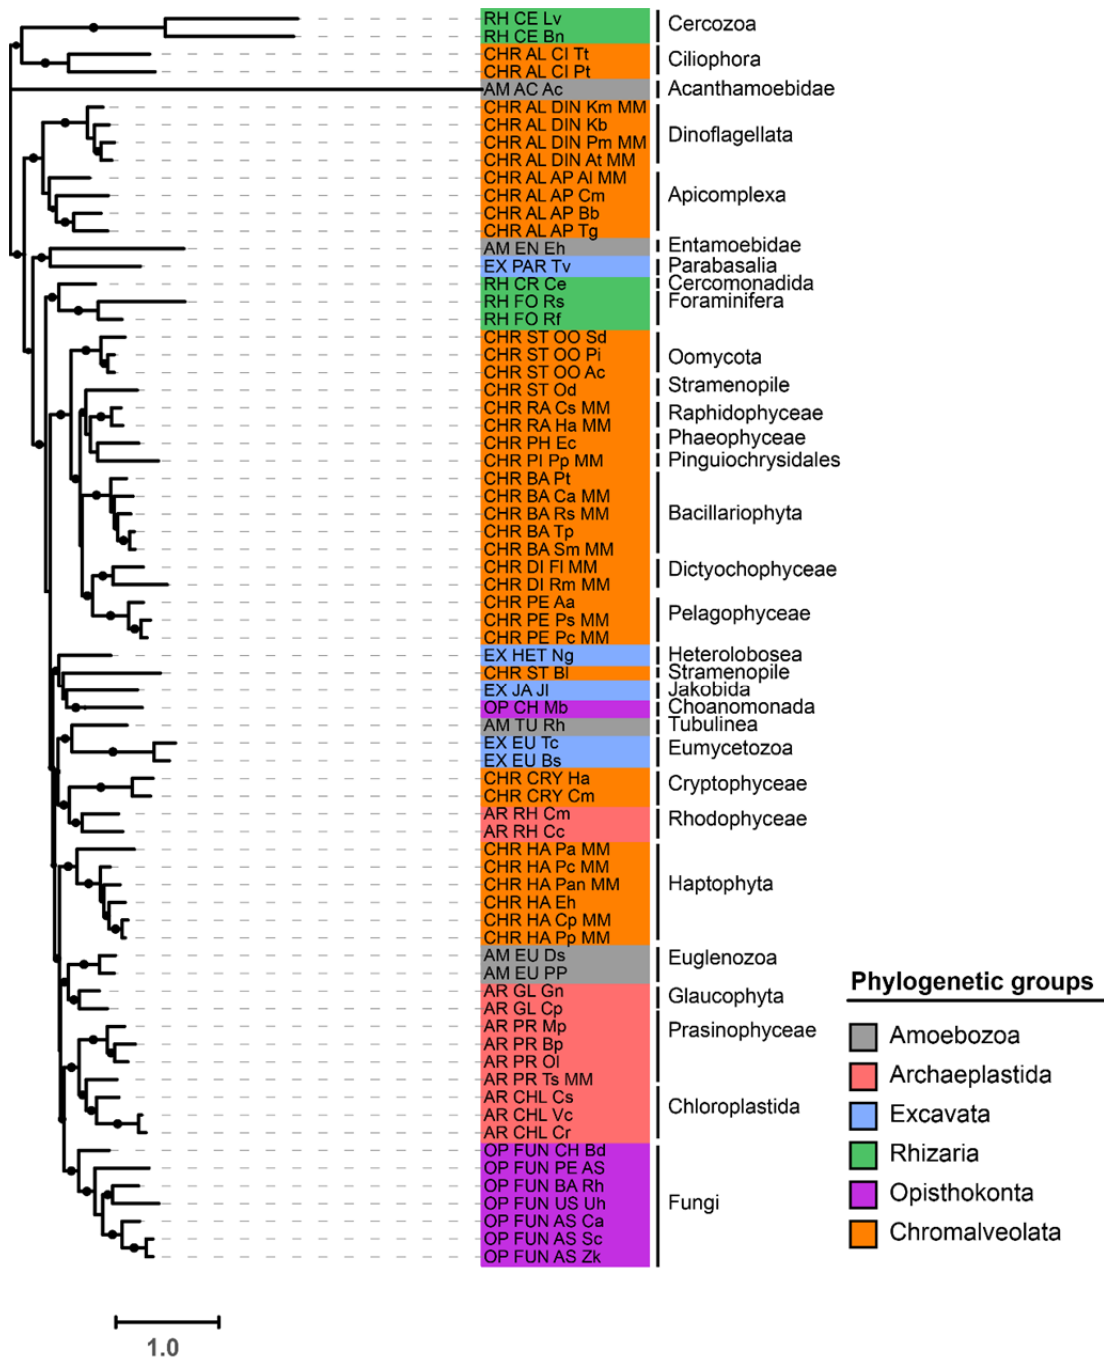

58

59 **Supplementary Figure 6:** Maximum likelihood phylogenetic tree of eukaryotic RPB1 (RNA  
60 polymerase II large subunit) used as reference to classify the RPB1 contigs assisted by pplacer.  
61 Node support (>50%) values >50% are shown as dark circles. Complete names and other details  
62 of the reference sequences are provided in Supplementary Data 2.

63

64 **Supplementary Table 1:** RNA-seq library sizes after quality trimming. The Quantuck Bay  
65 samples were sequenced as single reads, while paired-end sequencing was carried out for the  
66 Narragansett Bay samples (denoted by X2). For Quantuck bay, the nutrient amendments were  
67 carried out in bottles filled with natural seawater from the bloom and amended with the  
68 following nutrients in triplicate: 25  $\mu$ M ammonium only (+Nitrogen), 4  $\mu$ M phosphate only  
69 (+Phosphorus), and 25  $\mu$ M ammonium and 4  $\mu$ M phosphate (+Nitrogen and +Phosphorus).  
70 Three additional bottles were filled and no nutrients were added (control). Similar amendments  
71 were conducted for the Narragansett Bay samples (see Alexander *et al.*, 2015).

|                  | Sample                       | Number of reads |
|------------------|------------------------------|-----------------|
| Quantuck Bay     | June 14, 2011 (QB-S1)        | 43,755,618      |
|                  | June 16, 2011 (QB-S2)        | 40,228,517      |
|                  | June 22, 2011 (QB-S3)        | 214,681,748     |
|                  | Nutrient amendment -control  | 41,156,535      |
|                  | +Nitrogen                    | 39,539,666      |
|                  | +Phosphorus                  | 36,797,290      |
|                  | +Nitrogen and +Phosphorus    | 37,442,936      |
| Narragansett Bay | 16-05-2012 (NB-S1)           | 88,207,422 X2   |
|                  | 21-05-2012 (NB-S2)           | 53,911,567 X2   |
|                  | 30-05-2012 (NB-S3)           | 68,734,805 X2   |
|                  | 4-06-2012 (NB-S4)            | 45,344,970 X2   |
|                  | 8-06-2012 (NB-S5)            | 55,025,398 X2   |
|                  | Nutrient amendment - control | 38,713,917 X2   |
|                  | -Phosphorus                  | 45,764,698 X2   |
|                  | +Phosphorus                  | 37,528,376 X2   |
|                  | -Nitrogen                    | 36,671,310 X2   |
|                  | +Nitrogen                    | 49,217,942 X2   |

72

73

74

75
